# Supplementary material for: Working in preschool increases the risk of hearing-related symptoms: a cohort study among Swedish women
Source: Springer Nature journal article supplement (doi:10.1007/s00420-019-01453-0), 2019-07-08
Supplement: MOESM1 [file 16907010]

Working in preschool increases the risk of hearing-related symptoms - a cohort study among Swedish women, International Archives of Occupational and Environmental Health, Sofie Fredriksson, Jeong-Lim Kim, Kjell Torén, Lennart Magnusson, Kim Kähäri, Mia Söderberg, Kerstin Persson Waye; Department of Occupational and Environmental Medicine, Public Health & Community Medicine, Institute of Medicine, Sahlgrenska Academy, University of Gothenburg, sofie.fredriksson@gu.se

**Online Resource 1** Questionnaire items, response alternatives and derived variables. The translation from Swedish has not been validated.

| Questionnaire item in full text                                                                                                                                                                                                                                                                                                                                        | Response alternatives                                                                                                                                                 | Derived variables                                                                                                                                                                                                                                                                            |
|------------------------------------------------------------------------------------------------------------------------------------------------------------------------------------------------------------------------------------------------------------------------------------------------------------------------------------------------------------------------|-----------------------------------------------------------------------------------------------------------------------------------------------------------------------|----------------------------------------------------------------------------------------------------------------------------------------------------------------------------------------------------------------------------------------------------------------------------------------------|
| <b>Hearing loss</b><br>"Do you have a hearing loss?"                                                                                                                                                                                                                                                                                                                   | - Yes<br>- No<br>- Don't know                                                                                                                                         | Self-reported hearing loss was defined as responding: "yes".<br>Also used in non-response survey.                                                                                                                                                                                            |
| <b>Difficulty perceiving speech</b><br>"Do you <u>at work</u> have trouble hearing what is said in an environment where several people are talking at the same time?"<br><br>"Do you <u>in leisure time</u> have trouble hearing what is said in an environment where several people are talking at the same time?"                                                    | - Yes<br>- No<br><br><i>Same response scale for both items.</i>                                                                                                       | Difficulty perceiving speech was defined as responding: "yes" to both work and leisure time.                                                                                                                                                                                                 |
| <b>Tinnitus</b><br>"Do you have tinnitus (a ringing, whistling or other sound without an external source), that lasts more than five minutes each time?"                                                                                                                                                                                                               | - No<br>- No, but I have had it<br>- Yes, a few times each month or more seldom<br>- Yes, once or twice a week<br>- Yes, many times each week<br>- Yes, everyday      | Tinnitus was defined as responding: "Yes, once or twice a week" or more often<br>Also used in non-response survey, where the response scale was:<br>- No<br>- Yes, once or twice a week or more often                                                                                        |
| <b>Hyperacusis</b><br>"Are you sensitive to sounds (feel discomfort or pain by everyday sounds)?"                                                                                                                                                                                                                                                                      | - No<br>- No, but I have had<br>- Yes, a few times each month or more seldom<br>- Yes, once or twice a week<br>- Yes, many times each week<br>- Yes, everyday         | Hyperacusis was defined as responding: "Yes, once or twice a week" or more often.                                                                                                                                                                                                            |
| <b>Sound-induced auditory fatigue</b><br>"Do you, during or after work, experience any of the following symptoms or disorders?"<br>- Sound fatigue"                                                                                                                                                                                                                    | - Never, seldom<br>- A few times each month<br>- Once or twice a week<br>- Many times each week<br>- Everyday                                                         | Sound-induced auditory fatigue was defined as responding: "once or twice a week" or more often.<br><br>The item was included in a matrix with other symptoms, such as headache and tiredness.                                                                                                |
| <b>Symptom onset</b><br>"When did you first notice that you had [hearing loss/ difficulty perceiving speech/tinnitus/hyperacusis]? Try to respond even if you do not remember the exact year or age when it was first noted."                                                                                                                                          | - Year (e.g. 2004)<br>- Age (e.g. 46)<br><br>(free text)                                                                                                              | Onset age was used if reported. Onset year was recalculated to onset age if reported. Age was used if both were reported, unless they differed by >3 years. If so, they were treated as missing.                                                                                             |
| <b>Can't hear conversation due to noise</b><br>"Is the sound level at your workplace sometimes so high that you have difficulty hearing what other people are saying?"<br><br><b>Have to raise voice due to noise</b><br>"How often are you at your workplace exposed to such high sound levels that you have to raise your voice to be able to talk to other people?" | - Never/almost never<br>- About 25% of time<br>- About 50% of time<br>- About 75% of time<br>- Always/almost always<br><br><i>Same response scale for both items.</i> | Reporting "About 25% of time" or more was used as cut-off for each item.<br><br>Noise exposed strata was defined as reporting: "25% of time" or more often on both items.                                                                                                                    |
| <b>Hearing protection at work</b><br>"Do you use earplugs or other hearing protection devices at your current workplace?"                                                                                                                                                                                                                                              | - Always/almost always<br>- Often<br>- Sometimes<br>- Never/rarely                                                                                                    | Hearing protection at work defined as responding: "always" or "often".                                                                                                                                                                                                                       |
| <b>Changed job or workplace due to noise</b><br>"Have you ever changed job or workplace due to noise or high sound levels?"                                                                                                                                                                                                                                            | - No<br>- Yes                                                                                                                                                         | Having ever changed job due to noise was defined as responding: "yes".                                                                                                                                                                                                                       |
| <b>Stressful working conditions</b><br>- Effort-Reward Imbalance, 10 items<br><br>- COPSOQ, emotional demands, short emotional scale 2 items                                                                                                                                                                                                                           | The items and response alternatives are published elsewhere:<br>(Siegrist J., 1996)<br>(Berthelsen, H. et al., 2013)                                                  | Imbalance between efforts and rewards were defined as an ERI ratio >1.<br>Emotional demands were defined as responding: "always" or "often" on both items.<br>Stress exposure strata was defined as having either ERI ratio >1 or emotional demands according to the definition given above. |
| <b>Stress (used in non-response analysis)</b><br>"How have you felt during the last 3 months?"<br>- I have had days where I constantly feel stressed."                                                                                                                                                                                                                 | - Not at all<br>- Sometimes<br>- Pretty often<br>- Almost all the time                                                                                                | Stress was defined as responding: "pretty often" or "almost all the time".                                                                                                                                                                                                                   |

Working in preschool increases the risk of hearing-related symptoms - a cohort study among Swedish women, International Archives of Occupational and Environmental Health, Sofie Fredriksson, Jeong-Lim Kim, Kjell Torén, Lennart Magnusson, Kim Kähäri, Mia Söderberg, Kerstin Persson Waye; Department of Occupational and Environmental Medicine, Public Health & Community Medicine, Institute of Medicine, Sahlgrenska Academy, University of Gothenburg, sofie.fredriksson@gu.se

### Online Resource 1 Continued

| Questionnaire item in full text                                                                                                                                                                                                                                                                    | Response alternatives                                                                                                                                                                                                                                                                                                                                                                                                                   | Derived variables                                                                                                                                                                                                                                                                                                                                                             |
|----------------------------------------------------------------------------------------------------------------------------------------------------------------------------------------------------------------------------------------------------------------------------------------------------|-----------------------------------------------------------------------------------------------------------------------------------------------------------------------------------------------------------------------------------------------------------------------------------------------------------------------------------------------------------------------------------------------------------------------------------------|-------------------------------------------------------------------------------------------------------------------------------------------------------------------------------------------------------------------------------------------------------------------------------------------------------------------------------------------------------------------------------|
| <b>Employment status</b><br>"What is your current main employment status?"                                                                                                                                                                                                                         | <ul style="list-style-type: none"> <li>- Currently working</li> <li>- On leave of absence or on parental leave</li> <li>- Job-seeker and/or in unemployment program</li> <li>- Student</li> <li>- Early retirement, disability pension or long-term sick leave (more than 3 months)</li> <li>- Age retired</li> <li>- Other</li> </ul>                                                                                                  | Currently working was defined as responding: "currently working".                                                                                                                                                                                                                                                                                                             |
| <b>Education level</b><br>"What is your highest attained education level?"<br><i>Item answered by the population control cohort only.</i>                                                                                                                                                          | <ul style="list-style-type: none"> <li>- Elementary school or similar</li> <li>- 2-years upper secondary school</li> <li>- 3-4 years upper secondary school</li> <li>- University shorter than 3 years</li> <li>- University 3 years or longer</li> <li>- Not completed compulsory school</li> </ul>                                                                                                                                    | University- level education for controls were defined as responding: "university shorter than 3 years" or "university 3 years or longer".<br><br>All preschool teachers have a university degree.                                                                                                                                                                             |
| <b>Family monthly income</b><br>"How much is the household's approximate total monthly income before taxes?"                                                                                                                                                                                       | <ul style="list-style-type: none"> <li>- 0-14999 SEK per month</li> <li>- 15000-29999 SEK per month</li> <li>- 30000-44999 SEK per month</li> <li>- 45000-59999 SEK per month</li> <li>- 60000 SEK or more per month</li> </ul>                                                                                                                                                                                                         | Family income of 30000 or more was used as a cut-off.                                                                                                                                                                                                                                                                                                                         |
| <b>Education and income combined</b><br>Based on the variables "education level" and "family monthly income"                                                                                                                                                                                       |                                                                                                                                                                                                                                                                                                                                                                                                                                         | Three levels were defined: <ul style="list-style-type: none"> <li>- Both university education 3 years or longer and family income <math>\geq 30000</math> SEK</li> <li>- Either university education 3 years or longer or family income <math>\geq 30000</math> SEK</li> <li>- Lower education level than university and family income <math>&lt; 30000</math> SEK</li> </ul> |
| <b>Smoking</b><br>"Have you ever smoked daily during at least a month?"                                                                                                                                                                                                                            | <ul style="list-style-type: none"> <li>- No</li> <li>- Yes</li> </ul>                                                                                                                                                                                                                                                                                                                                                                   | Smoking was defined as responding: "yes".                                                                                                                                                                                                                                                                                                                                     |
| <b>Family history of hearing loss</b><br>"Did any of your biological parents and/or siblings have a hearing loss before the age of 55 years?"                                                                                                                                                      | <ul style="list-style-type: none"> <li>- No</li> <li>- Yes</li> <li>- Don't know</li> </ul>                                                                                                                                                                                                                                                                                                                                             | Family history of hearing loss was defined as responding: "yes".                                                                                                                                                                                                                                                                                                              |
| <b>Ear infections</b><br>"Have you ever had problems with otitis or ear infections?"                                                                                                                                                                                                               | <ul style="list-style-type: none"> <li>- Never or at most one time</li> <li>- Yes, a few times</li> <li>- Yes, many times and/or long-term</li> </ul>                                                                                                                                                                                                                                                                                   | Recurrent infections was defined as responding: "yes, many times and/or long-term".                                                                                                                                                                                                                                                                                           |
| <b>Tympanostomy tube</b><br>"Have you ever had ventilation tubes implanted in your eardrum?"                                                                                                                                                                                                       | <ul style="list-style-type: none"> <li>- No</li> <li>- Yes</li> </ul>                                                                                                                                                                                                                                                                                                                                                                   | Tympanostomy tube was defined as responding: "yes".                                                                                                                                                                                                                                                                                                                           |
| <b>Noisy activities leisure time</b><br>"How often in your leisure time do you participate in activities where noise or high sound levels occur?<br>With activity we mean for example: shooting/hunting, playing in a band, concert/disco, driving motorcycle, working with noisy tools/machines." | <ul style="list-style-type: none"> <li>- Every day (4 points)</li> <li>- Some or a few times each week (3 points)</li> <li>- Some or a few times each month (2 points)</li> <li>- Some or a few times each year (1 point)</li> <li>- Never/rarely (0 points)</li> </ul>                                                                                                                                                                 | Leisure time exposure was defined as responding: "some or a few times a month" or more often.<br><br>Points calculated for sum score of leisure noise index are given in parenthesis for each response alternative.                                                                                                                                                           |
| <b>Hearing protection leisure time</b><br>"Do you use hearing protection when you engage in noisy leisure activities?"                                                                                                                                                                             | <ul style="list-style-type: none"> <li>- Always/almost always (0 points)</li> <li>- Often (1 point)</li> <li>- Sometimes (2 points)</li> <li>- Never/rarely (3 points)</li> </ul>                                                                                                                                                                                                                                                       | Hearing protection in leisure time was defined as responding: "always/almost always" or "often".<br><br>Points calculated for sum score of leisure noise index are given in parenthesis for each response alternative.                                                                                                                                                        |
| <b>Loud music in headphones</b><br>"How often do listen to portable music players with headphones?"<br><br>"When you listen, approximately how much of the maximum volume setting do listen to?"                                                                                                   | <ul style="list-style-type: none"> <li>- Every day (4 points)</li> <li>- Some or a few times each week (3 points)</li> <li>- Some or a few times each month (2 points)</li> <li>- Some or a few times each year (1 point)</li> <li>- Never/rarely (0 points)</li> <li>- 25% of max volume (1 point)</li> <li>- 50% of max volume (2 points)</li> <li>- 75% of max volume (3 points)</li> <li>- 100% of max volume (4 points)</li> </ul> | Loud music in headphones was defined as responding: "some or a few times a month" in combination with a volume of "75% of max" or more.<br><br>Points calculated for sum score of leisure noise index are given in parenthesis for each response alternative.                                                                                                                 |
